# Supplementary material
Source: ML conference proceedings conference paper supplement (https://openreview.net/forum?id=1YEF6TA8Di)
Supplement: supplementary_material [file attachment]

---

# Supplementary Material of “Langevin Quasi-Monte Carlo”

---

Anonymous Author(s)

Affiliation

Address

email

## 1 Proof of Theorem 4.1

2 We start by decomposing the error  $|\frac{1}{n} \sum_{k=1}^n f(\theta_k) - \pi(f)|$  into three parts

$$\begin{aligned} \left| \frac{1}{n} \sum_{k=1}^n f(\theta_k) - \pi(f) \right| &\leq \left| \frac{1}{n} \sum_{k=\ell+1}^n f(\theta_k) - \frac{1}{n} \sum_{k=\ell+1}^n \bar{f}_\ell(\mathbf{w}_k^{(\ell)}) \right| + \left| \frac{1}{n} \sum_{k=\ell+1}^n \bar{f}_\ell(\mathbf{w}_k^{(\ell)}) - \pi(f) \right| + \frac{\ell}{n} 2\|f\|_\infty \\ &= (I) + (II) + \frac{2\ell}{n} \|f\|_\infty. \end{aligned}$$

3 We first upper bound (I).

4 **Lemma 1** (Upper bound of (I); adapted from Lemma 6.1.4 of Chen (2011)). *If the transition map  $\psi$*   
 5 *is a contraction with parameter  $\rho$  and if  $f$  is 1-Lipschitz, then*

$$|\bar{f}_\ell(\mathbf{w}_k^{(\ell)}) - f(\theta_k)| \leq \left( \max_{0 \leq i \leq n} \|\theta_i\| + \mathbb{E}_\pi[\|\theta\|] \right) \rho^\ell.$$

6 *Proof of Lemma 1.* Note that

$$\begin{aligned} |\bar{f}_\ell(\mathbf{w}_k^{(\ell)}) - f(\theta_k)| &\leq \int |f(\psi_\ell(\theta, \mathbf{w}_k^{(\ell)})) - f(\psi_\ell(\theta_{k-\ell}, \mathbf{w}_k^{(\ell)}))| \pi(d\theta) \\ &\leq \int \|(\psi_\ell(\theta, \mathbf{w}_k^{(\ell)})) - (\psi_\ell(\theta_{k-\ell}, \mathbf{w}_k^{(\ell)}))\| \pi(d\theta) \\ &\leq \rho \int \|(\psi_{\ell-1}(\theta, \mathbf{w}_{k-1}^{(\ell-1)})) - (\psi_{\ell-1}(\theta_{k-\ell}, \mathbf{w}_{k-1}^{(\ell-1)}))\| \pi(d\theta) \\ &\leq \rho^\ell \int \|\theta - \theta_{k-\ell}\| \pi(d\theta) \\ &\leq \rho^\ell \left( \max_{0 \leq i \leq n} \|\theta_i\| + \mathbb{E}_\pi[\|\theta\|] \right). \end{aligned}$$

7 □

8 To bound (II), note that  $\frac{1}{n-\ell} \sum_{k=\ell+1}^n \bar{f}_\ell(\mathbf{w}_k^{(\ell)})$  is estimating

$$\mathbb{E} [\bar{f}_\ell(\mathbf{w}^{(\ell)})] = \int \psi_\ell(\theta, \mathbf{w}^{(\ell)}) \pi(d\theta) d\mathbf{w}^{(\ell)} =: \pi P_\ell(f).$$

9 Here,  $\pi P_\ell$  denote the distribution of the  $\ell$ -step state  $\theta_\ell$  starting from  $\theta_0 \sim \pi$ . So we have the further  
 10 decomposition

$$\begin{aligned} (II) &\leq \left| \frac{1}{n-\ell} \sum_{k=\ell+1}^n \bar{f}_\ell(\mathbf{w}_k^{(\ell)}) - \pi(f) \right| + \frac{\ell}{n-\ell} \|f\|_\infty \\ &\leq |\pi(f) - \pi P_\ell(f)| + \left| \frac{1}{n-\ell} \sum_{k=\ell+1}^n \bar{f}_\ell(\mathbf{w}_k^{(\ell)}) - \pi P_\ell(f) \right| + \frac{\ell}{n-\ell} \|f\|_\infty \\ &\leq (II)' + (II)'' + \frac{\ell}{n-\ell} \|f\|_\infty. \end{aligned}$$

11 The first term  $(II)'$  is due to the discretization in time. The second term  $(II)''$  is the numerical  
 12 integration error.

13 To bound  $(II)'$ , we use the following result.

14 **Lemma 2** (Upper bound on discretization error  $(II)'$ ). *Under Assumption 1, we have for  $f$  1-*  
 15 *Lipschitz,*

$$|\pi(f) - \pi P_\ell(f)| \leq \frac{3\sqrt{2}}{2} \frac{L}{M} h^{1/2} d.$$

16 *Proof of Lemma 2.* We let  $\theta(t)$  be the continuous-time Langevin diffusion with  $\theta(0) = \theta_0 \sim \pi$ ,  
 17  $W_{t_{k+1}} - W_{t_k} = \sqrt{h}\xi_{k+1}$ , where  $\xi_{k+1} \stackrel{iid}{\sim} \mathcal{N}(0, I_d)$ ,  $t_k = kh$ . So we have

$$\theta(t_{k+1}) = \theta(t_k) - \int_{t_k}^{t_{k+1}} \nabla U(\theta(s)) ds + \sqrt{2h}\xi_{k+1}$$

18 and

$$\theta_{k+1} = \theta_k - h\nabla U(\theta_k) + \sqrt{2h}\xi_{k+1}.$$

19 Combing the previous two equations gives

$$\theta(t_{k+1}) - \theta_{k+1} = \theta(t_k) - \theta_k - h[\nabla U(\theta(t_k)) - \nabla U(\theta_k)] - \int_{t_k}^{t_{k+1}} \nabla U(\theta(s)) - \nabla U(\theta(t_k)) ds.$$

20 Let  $\Delta_k = \theta(t_k) - \theta_k$ . The last display reads

$$\Delta_{k+1} = \Delta_k - h[\nabla U(\theta_k + \Delta_k) - \nabla U(\theta_k)] - \int_{t_k}^{t_{k+1}} \nabla U(\theta(s)) - \nabla U(\theta(t_k)) ds.$$

21 By the contracting property (6) in the main paper,

$$\|\Delta_k - h[\nabla U(\theta_k + \Delta_k) - \nabla U(\theta_k)]\| \leq \rho \|\Delta_k\|.$$

22 Taking expectation and use  $L$ -smoothness of  $U$ , we have

$$\mathbb{E} [\|\Delta_{k+1}\|] \leq \rho \mathbb{E} [\|\Delta_k\|] + L \int_{t_k}^{t_{k+1}} \mathbb{E} [\|\theta(s) - \theta(t_k)\|] ds.$$

23 By Lemma 3 of Dalalyan and Karagulyan (2019),  $\mathbb{E} [\|\nabla U(\theta)\|_2^2] \leq Ld$ . So we have  $\mathbb{E} [\|\nabla U(\theta)\|] \leq$

24  $\sqrt{d\mathbb{E} [\|\nabla U(\theta)\|_2^2]} \leq \sqrt{Ld}$ . Because  $\theta(t)$  is a stationary process,

$$\begin{aligned} \int_{t_k}^{t_{k+1}} \mathbb{E} [\|\theta(s) - \theta(t_k)\|] ds &= \int_0^h \mathbb{E} [\|\theta(t) - \theta(0)\|] dt \\ &= \int_0^h \mathbb{E} \left[ \left\| - \int_0^t \nabla U(\theta(s)) ds + \sqrt{2}W_t \right\| \right] dt \\ &\leq \int_0^h \int_0^t \mathbb{E} [\|\nabla U(\theta(s))\|] ds dt + \int_0^h \sqrt{2} \mathbb{E} [\|W_t\|] dt \\ &= \frac{h^2}{2} \sqrt{Ld} + \int_0^h \sqrt{2t} \mathbb{E} [\|\xi_1\|] dt. \end{aligned}$$

25 Note that

$$\mathbb{E} [\|\xi_1\|] = \sqrt{2} \frac{\Gamma(d/2 + 1/2)}{\Gamma(d/2)} \leq \sqrt{2} \left(\frac{d+1}{2}\right)^{1/2} = \sqrt{d+1}.$$

26 Thus,

$$\begin{aligned} \int_{t_k}^{t_{k+1}} \mathbb{E} [\|\theta(s) - \theta(t_k)\|] ds &\leq \frac{1}{2} L^{1/2} h^2 d + \frac{3\sqrt{2}}{2} h^{3/2} d^{1/2} \\ &\leq \frac{\sqrt{2}}{2} h^{3/2} d + \frac{3\sqrt{2}}{2} h^{3/2} d^{1/2} \\ &\leq \frac{3\sqrt{2}}{2} h^{3/2} d. \end{aligned}$$

27 Denote  $r = \frac{3\sqrt{2}}{2} L h^{3/2} d$ . So

$$\begin{aligned} \mathbb{E} [\|\Delta_{k+1}\|] &\leq \rho \mathbb{E} [\|\Delta_k\|] + r \leq \rho^{k+1} \mathbb{E} [\|\Delta_0\|] + \sum_{i=0}^k \rho^i r \\ &\leq \frac{r}{1-\rho} = \frac{3\sqrt{2}}{2} \frac{L}{M} h^{1/2} d \end{aligned}$$

28 Therefore, for any  $k \geq 1$ ,

$$\begin{aligned} |\pi(f) - \pi P_k(f)| &= |\mathbb{E} [f(\theta(t_k))] - \mathbb{E} [f(\theta_k)]| \leq \mathbb{E} [|f(\theta(t_k)) - f(\theta_k)|] \\ &\leq \mathbb{E} [\|\Delta_k\|] \leq \frac{3\sqrt{2}}{2} \frac{L}{M} h^{1/2} d. \end{aligned}$$

29

□

30 **Theorem 1.1** (Theorem 9.8 of Niederreiter (1992)). *Let  $v_0, v_1, \dots$  be an LFSR with offset  $s$  and*  
 31 *period  $n = 2^m - 1$  which satisfy  $\gcd(m, n) = 1$ . Then the sequence  $\{\mathbf{u}_i\}_{i=0}^{n-1} \subset [0, 1]^s$  with*  
 32  *$\mathbf{u}_i = (v_i, v_{i+1}, \dots, v_{i+s-1})$  has, on average, star-discrepancy*

$$O(n^{-1}(\log n)^{d+1} \log \log n)$$

33 *with an implied constant depending only on  $d$  and the average is taken over all primitive polynomials*  
 34 *over  $GF(2)$  of degree  $m$ .*

35 *Proof of Theorem 4.1.* The error on the left-hand-side is bounded by

$$(I) + (II)' + (II)'' + \frac{4\ell}{n} \|f\|_\infty.$$

36 Lemma 1 shows that  $(I) \leq (\max_{0 \leq i < n} \|\theta_i\| + \mathbb{E}_\pi [\|\theta\|]) \rho^\ell \leq (\max_{0 \leq i \leq n} \|\theta_i\| + \mathbb{E}_\pi [\|\theta\|]) h^{1/2}$  since  
 37  $\ell = \lceil (1/2) \log_\rho h \rceil$ . Lemma 2 shows that  $(II)' \leq \frac{3\sqrt{2}}{2} \frac{L}{M} d h^{1/2}$ . Denote  $C_2 = \max_{0 \leq i \leq n} \|\theta_i\| +$   
 38  $\mathbb{E}_\pi [\|\theta\|] + \frac{3\sqrt{2}}{2} \frac{L}{M} d$ . So  $(I) + (II)' \leq C_2 h^{1/2}$ .

39 By Theorem 1.1 and the condition that  $\gcd(d\ell, n) = 1$ , the star-discrepancy  $D^*(\{\bar{w}_k^{(\ell)}\}_{k \geq 1})$  is  
 40 upper bounded by  $O(n^{-1}(\log n)^{d\ell+1} \log \log n)$ . Finally, by Koksma-Hlawka inequality, we have  
 41  $(II)'' \leq \|\bar{f}_\ell\|_{\text{HK}} \cdot D^*(\{\bar{w}_k^{(\ell)}\}_{k \geq 1})$ . Thus,  $(II)'' + \frac{4\ell}{n} \|f\|_\infty \leq C_1 n^{-1+\delta}$ , where  $\delta$  hides the poly-  
 42 logarithmic terms in  $\log n$  and  $C_1$  depends on  $d, \ell, \|f_\ell\|_{\text{HK}}$ .

43 Therefore, the upper bound becomes

$$(I) + (II)' + (II)'' + \frac{4\ell}{n} \|f\|_\infty \leq C_1 n^{-1+\delta} + C_2 h^{1/2}.$$

44

□

45 **References**

- 46 Chen, S. (2011). *Consistency and convergence rate of Markov chain quasi Monte Carlo with examples.*  
47 PhD thesis, Stanford University.
- 48 Dalalyan, A. S. and Karagulyan, A. (2019). User-friendly guarantees for the Langevin Monte Carlo  
49 with inaccurate gradient. *Stochastic Processes and their Applications*, 129(12):5278–5311.
- 50 Niederreiter, H. (1992). *Random Number Generation and Quasi-Monte Carlo Methods*. SIAM.
